# Supplementary material for: Targeting the glycine-rich domain of TDP-43 with antibodies prevents its aggregation in vitro and reduces neurofilament levels in vivo
Source: PubMed Central journal article supplement (PMC10334564; doi:10.1186/s40478-023-01592-z), 2023-07-11
Supplement: 40478_2023_1592_MOESM1_ESM.pdf [file 40478_2023_1592_MOESM1_ESM.pdf]

**A**

| #  | peptide sequence                                 | position in hTDP-43 | domain | immunized in rNLS8 mice | antibody clone | isotype        |
|----|--------------------------------------------------|---------------------|--------|-------------------------|----------------|----------------|
| 1  | <b>C-RVTEDEENDEPIEIPSEDDG</b>                    | 6-24                | N      | TDP1+3                  |                |                |
| 2  | C-GLRYRNPVSQCMR                                  | 39-52               | N      |                         |                |                |
| 3  | <b>C-YPKDNKRKMDETDA</b>                          | 77-90               | N      | TDP1+3                  | 25C1<br>27A3   | IgG2c<br>IgG1  |
| 4  | C-KRAVQKTS                                       | 97-105              | N      |                         |                |                |
| 5  | <b>C-WKTTEQDLKEYFST</b>                          | 113-126             | RRM1   | TDP5+7                  |                |                |
| 6  | C-VKKDLKTGHSKGF                                  | 135-147             | RRM1   |                         |                |                |
| 7  | <b>C-TEYETQVKVMSQRHMIDGRWCDCKLPNSKQSQDEPLRSR</b> | 153-191             | RRM1   | TDP5+7                  | 26A2<br>26F12  | IgG2a<br>IgG1  |
| 8  | <b>C-TEDMTEDELREFF</b>                           | 198-211             | RRM2   | TDP8+9                  | 30D3           | IgG2c          |
| 9  | <b>C-GEDLIKGISVHISNA</b>                         | 244-260             | RRM2   | TDP8+9                  |                |                |
| 10 | <b>C-SNAEPKHNSNRQLERSGRFGGNPGGFGNQGGFGNSRGGG</b> | 258-296             | C      | TDP10+12                | 31D9<br>31E9   | IgG1<br>IgG1   |
| 11 | C-LGNNQGSNMGGGM                                  | 299-311             | C      |                         |                |                |
| 12 | <b>C-SQQNQSGPSGNNQNQGNMQREPNQAFGSGNNSYSGSNS</b>  | 342-379             | C      | TDP10+12                | 36C5<br>36C10  | IgG2c<br>IgG2c |
| 13 | C-SASNAGSGSGF                                    | 387-397             | C      |                         |                |                |
| 14 | C-SMDSKSSGWGM                                    | 404-414             | C      |                         |                |                |
| 15 | <b>C-SMDSKS(p)S(p)GWG</b>                        | 404-413             | C      | TDP15                   |                |                |

**B**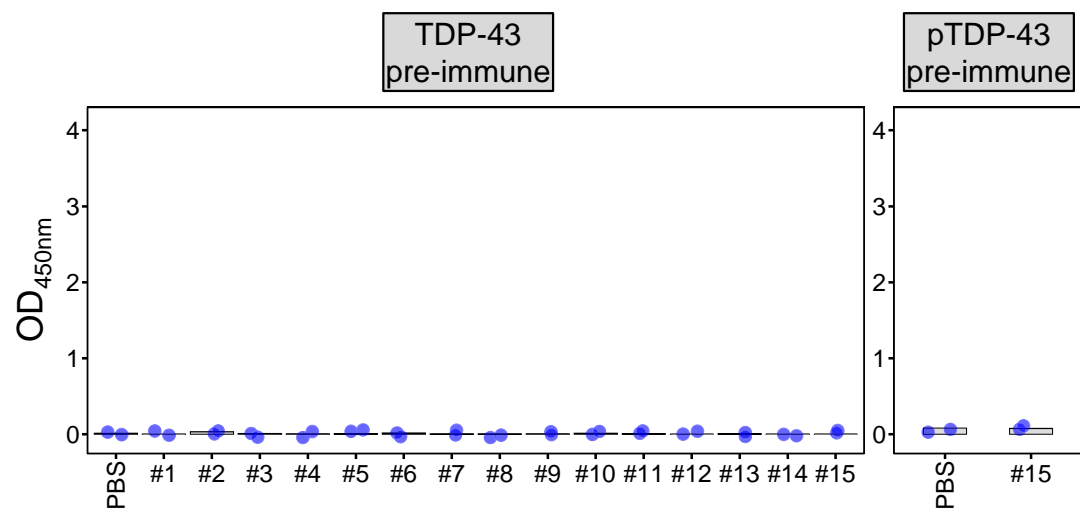**Figure S1**

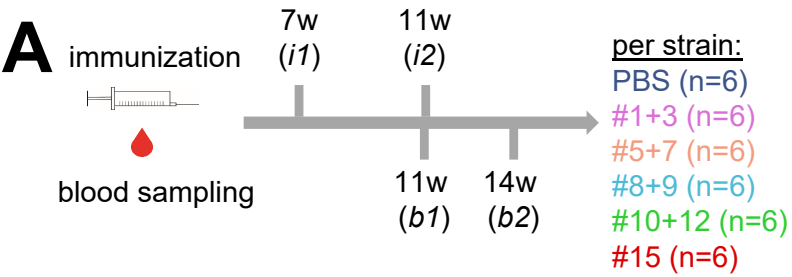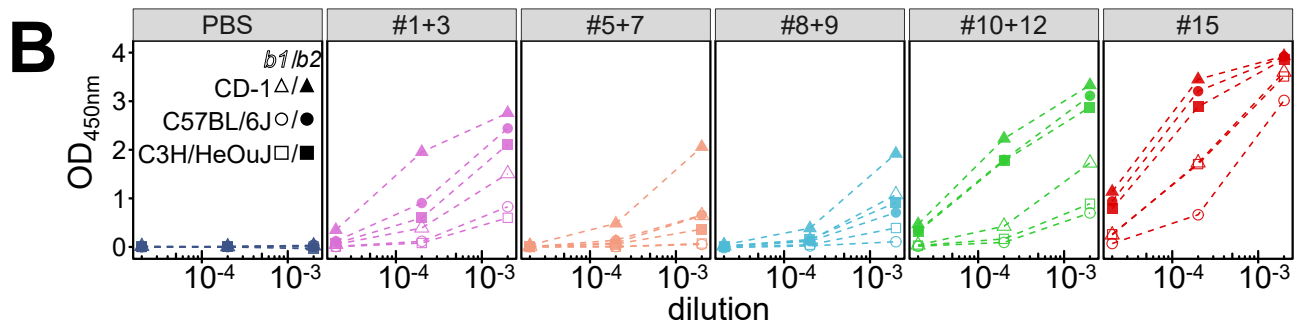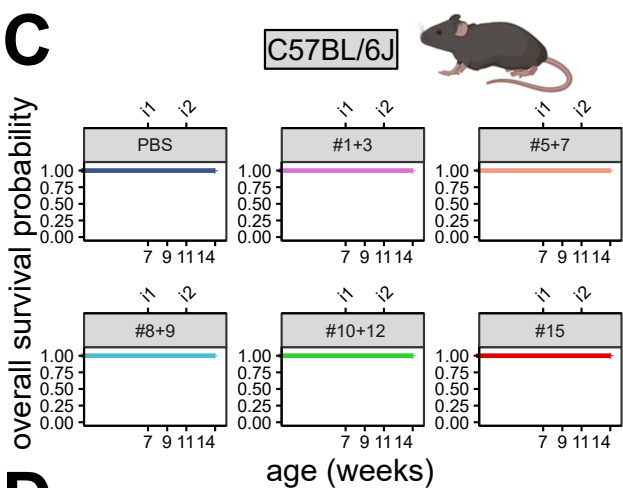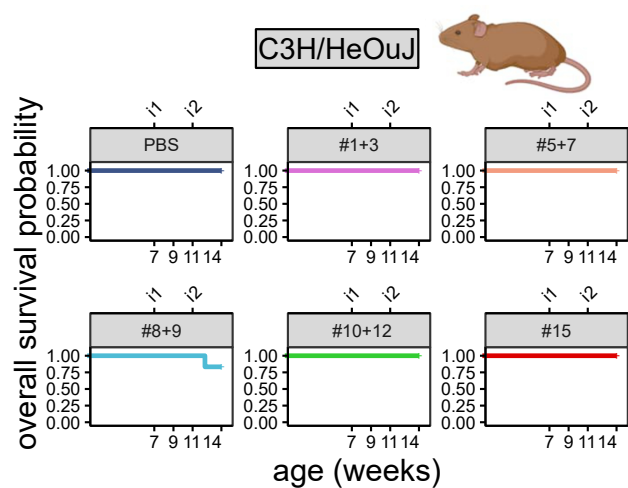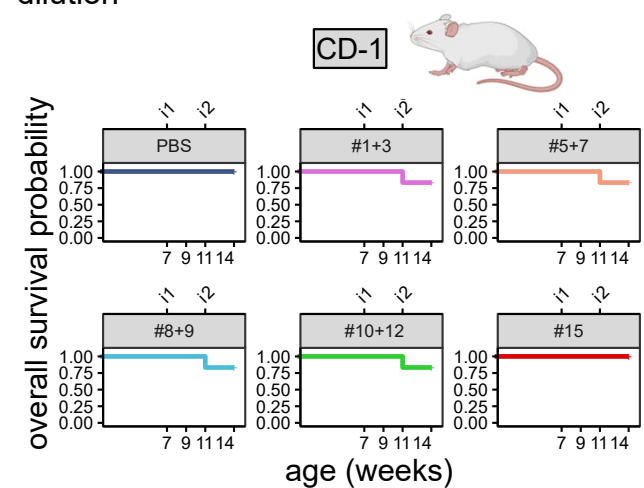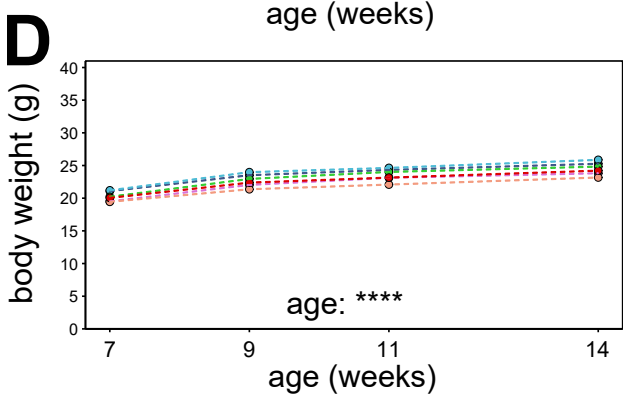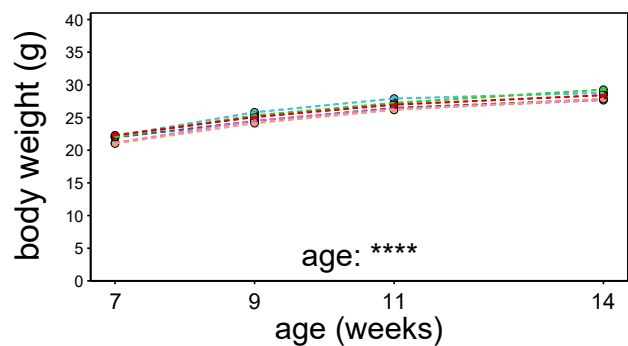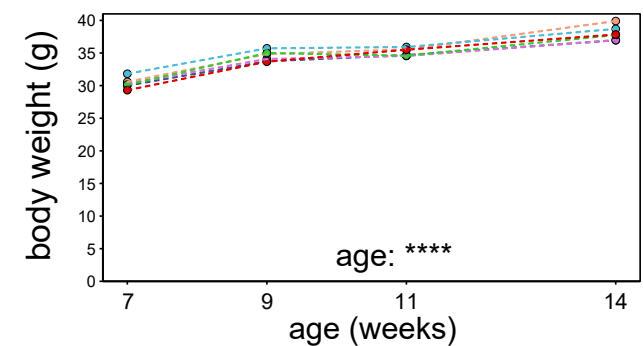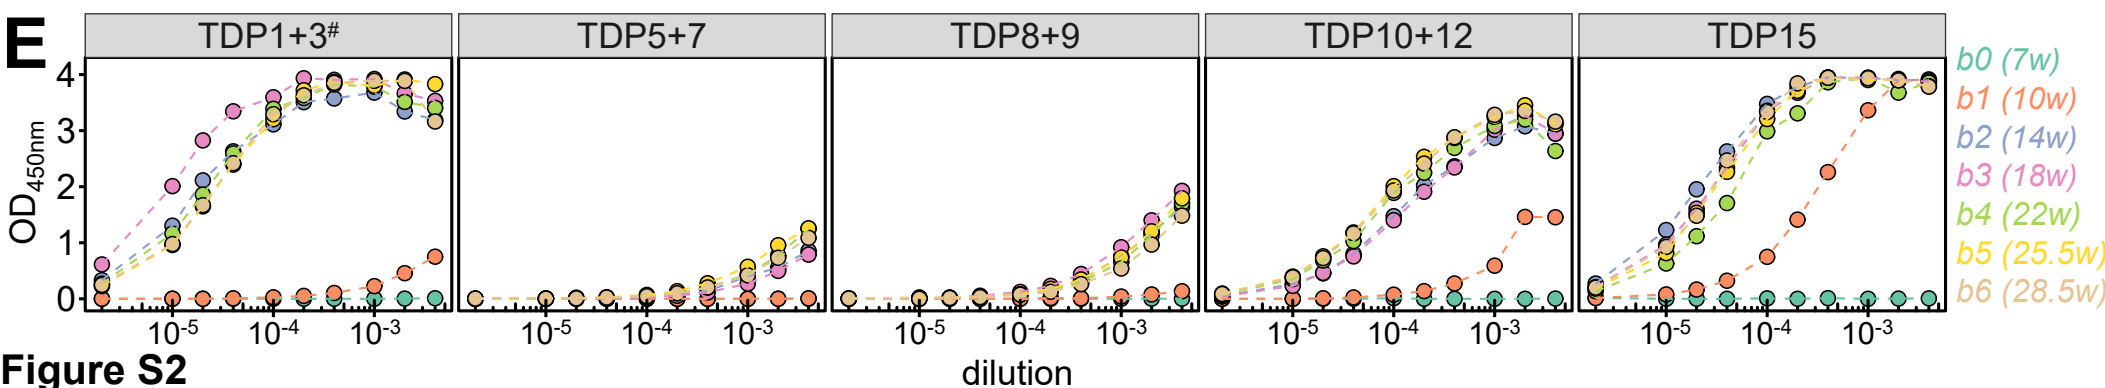

Figure S2

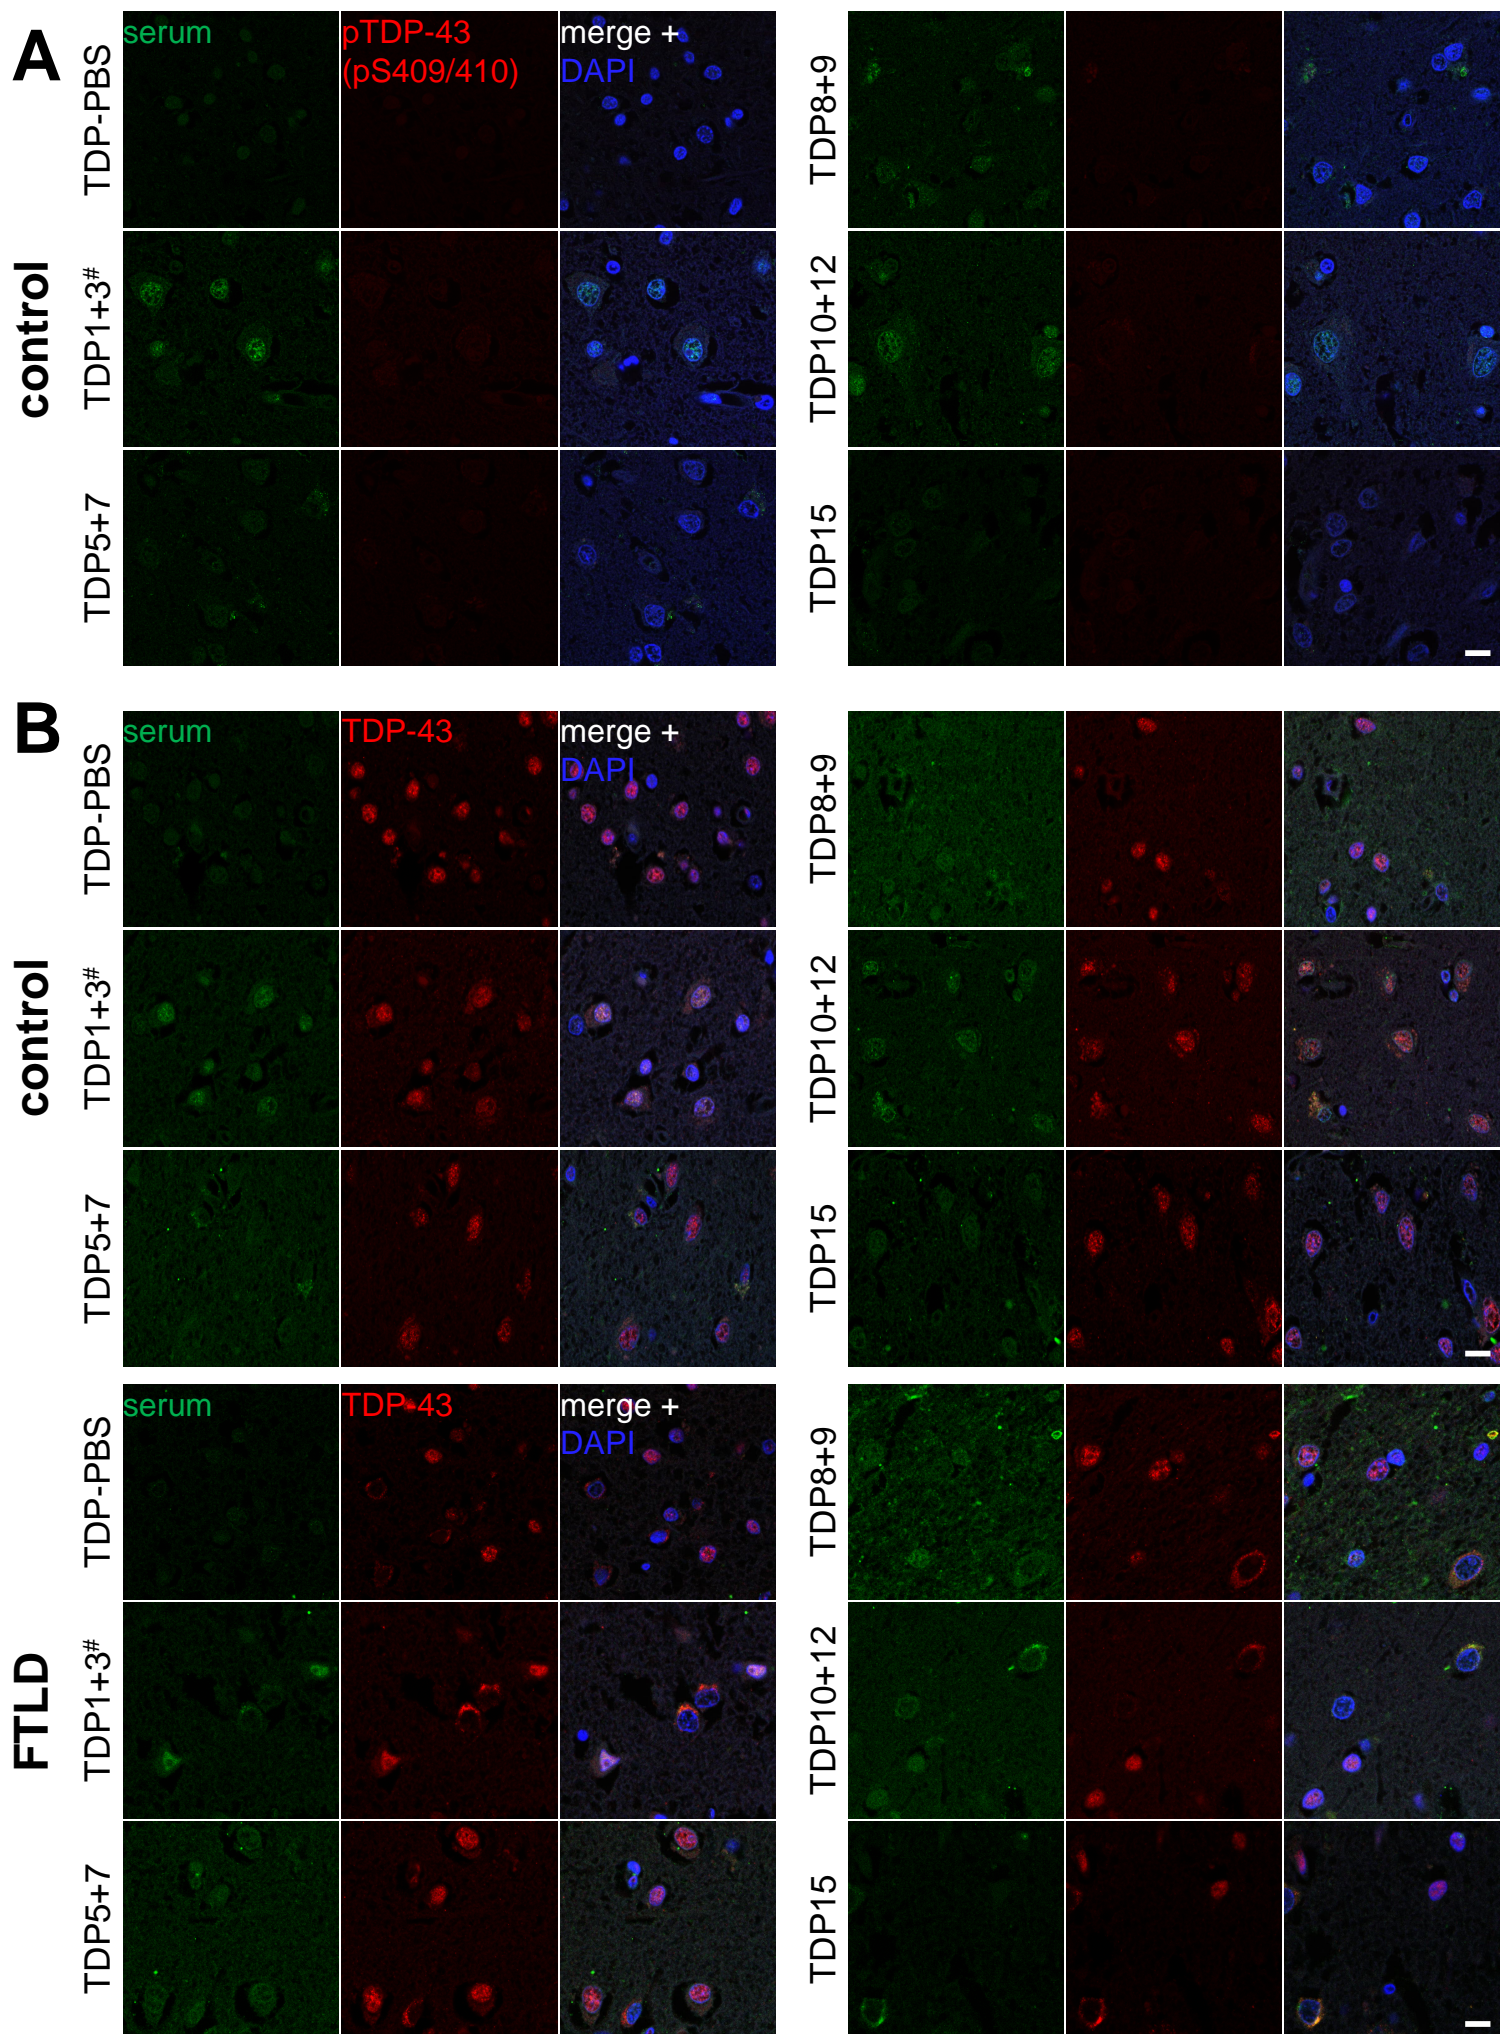

Figure S3

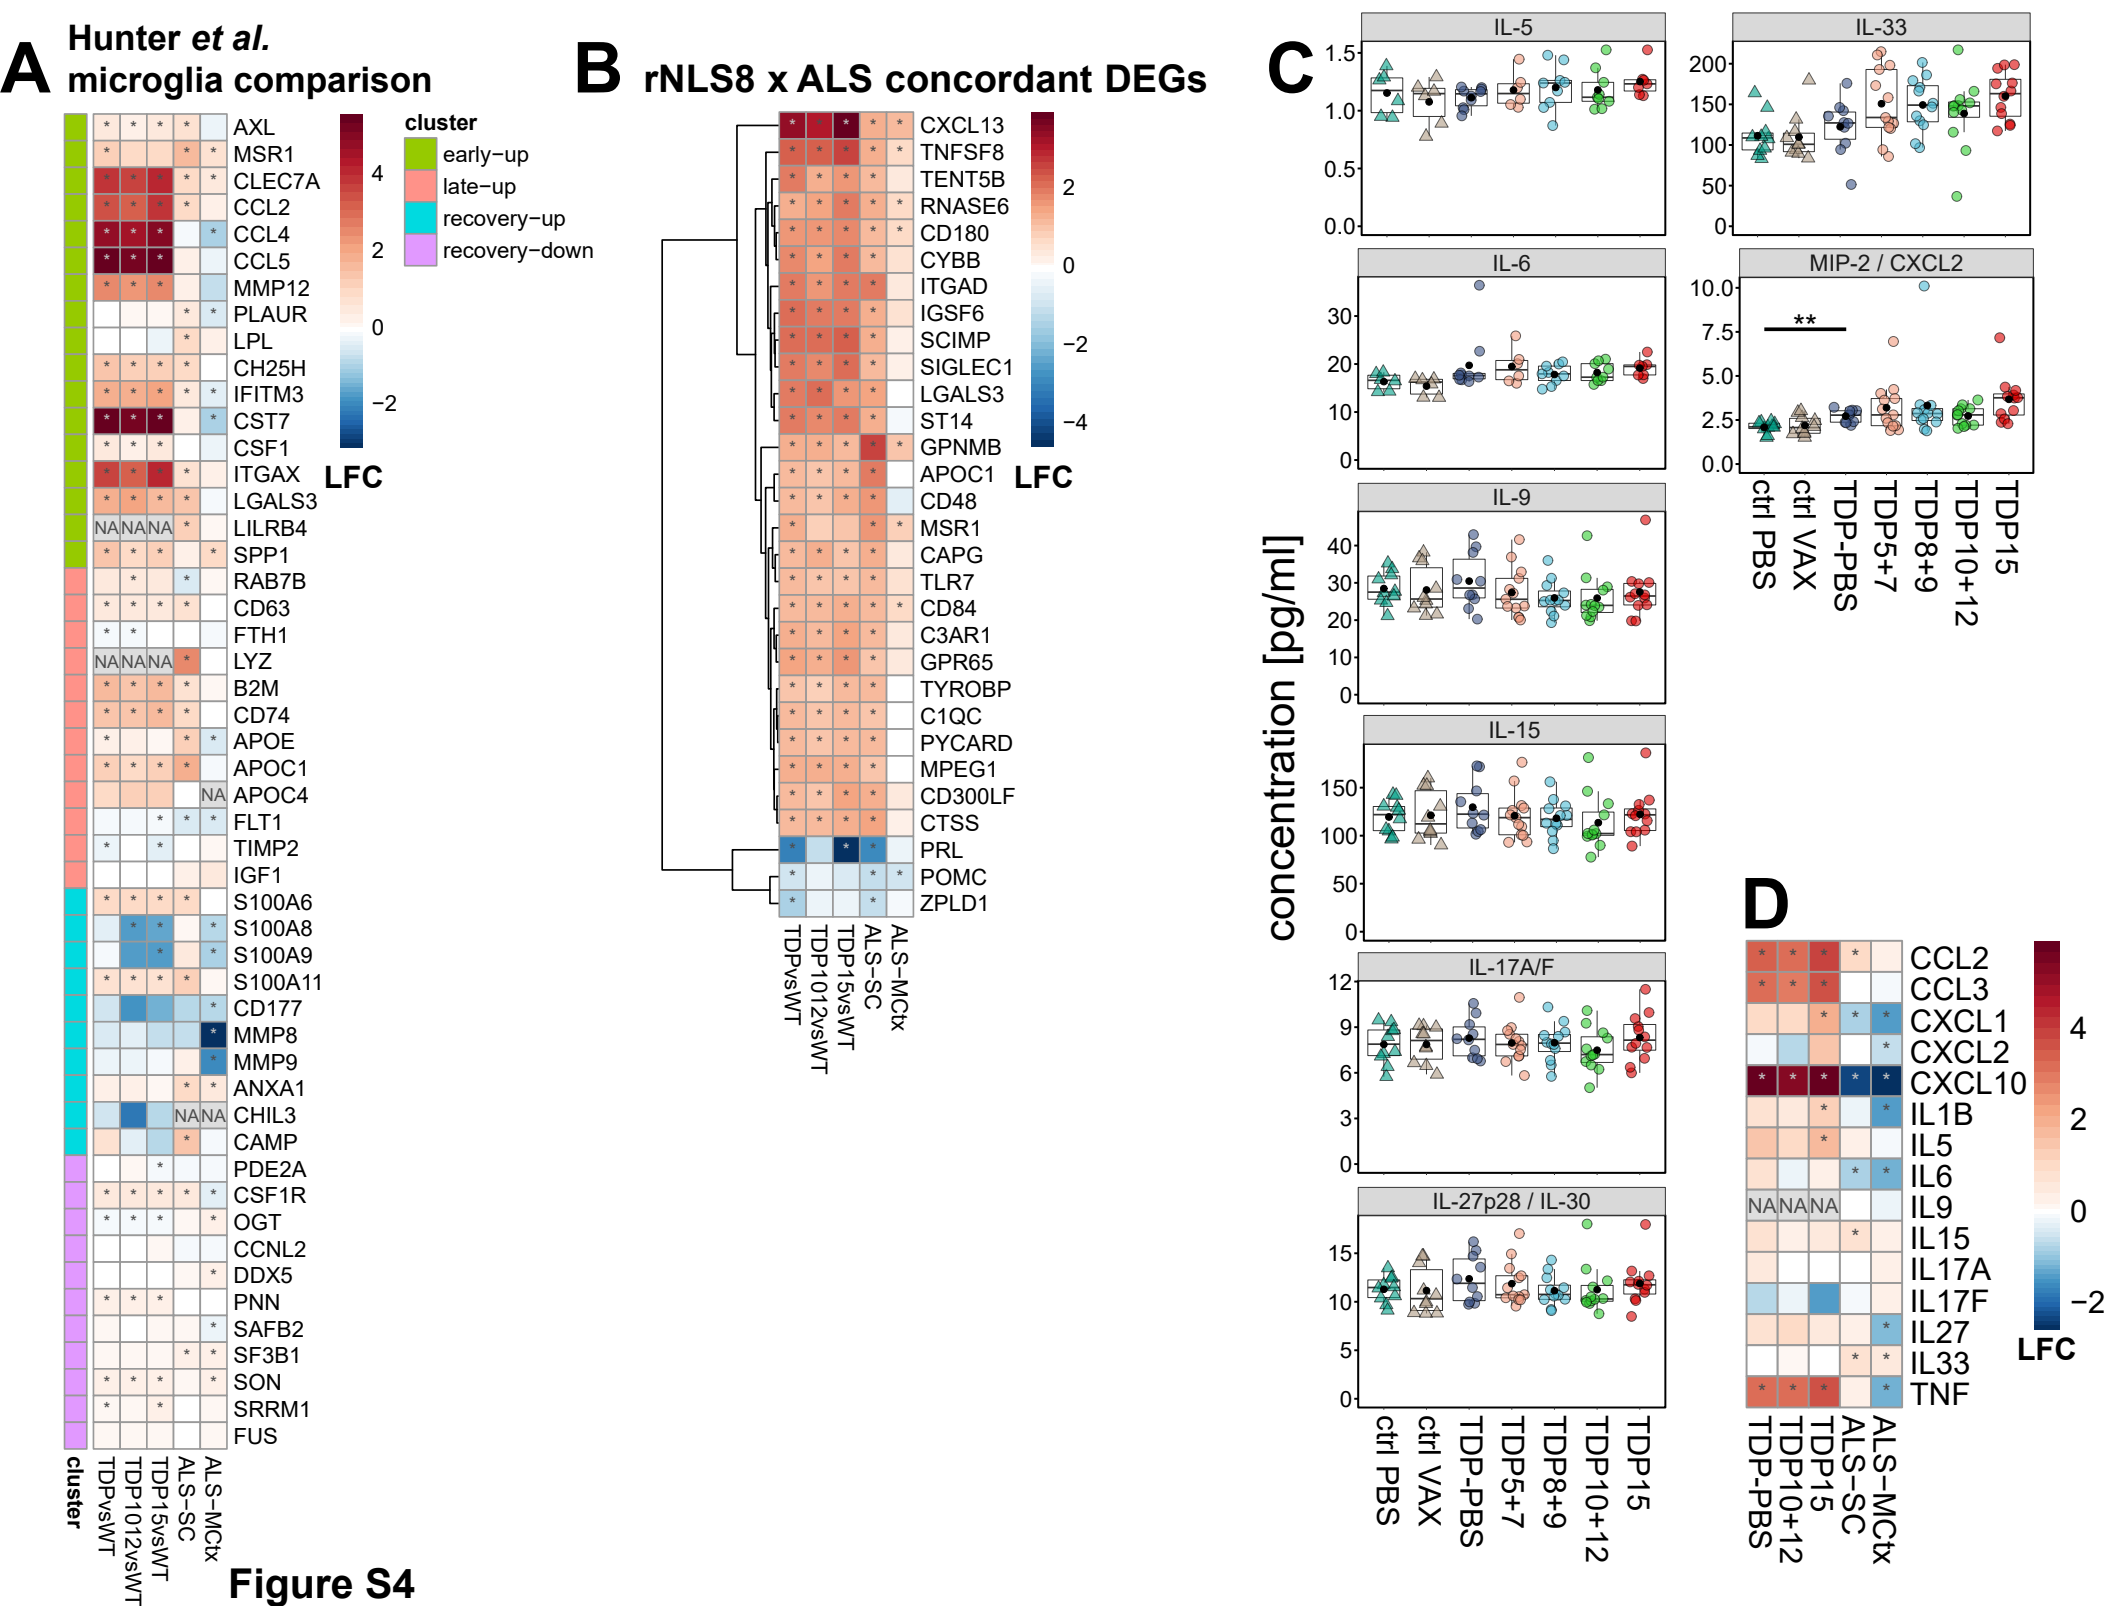

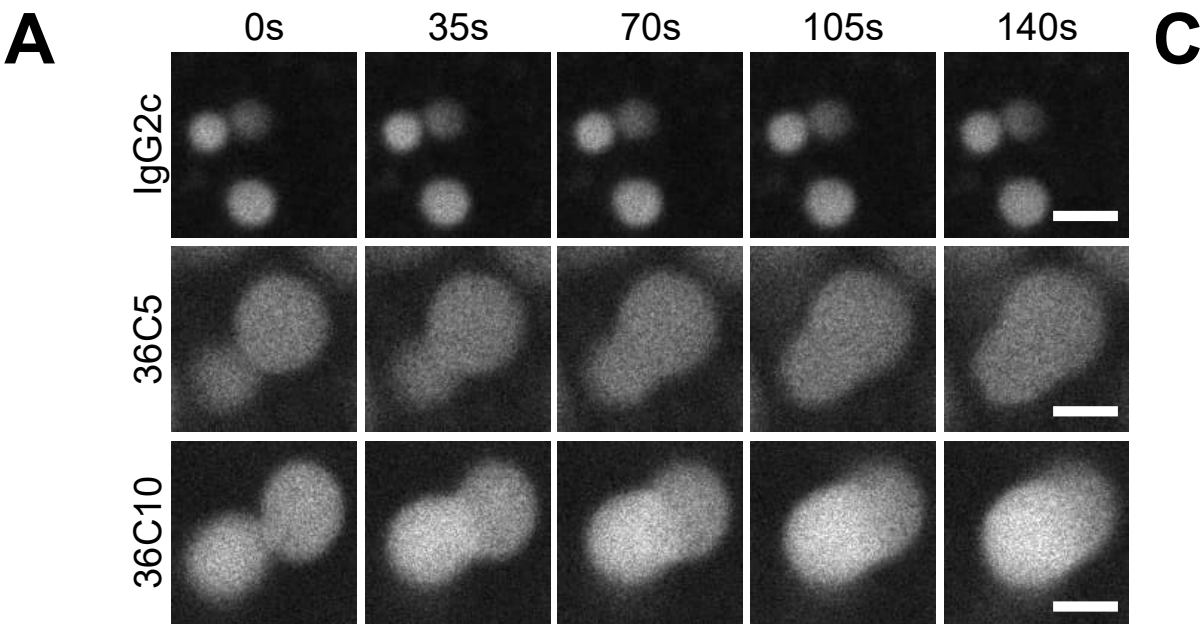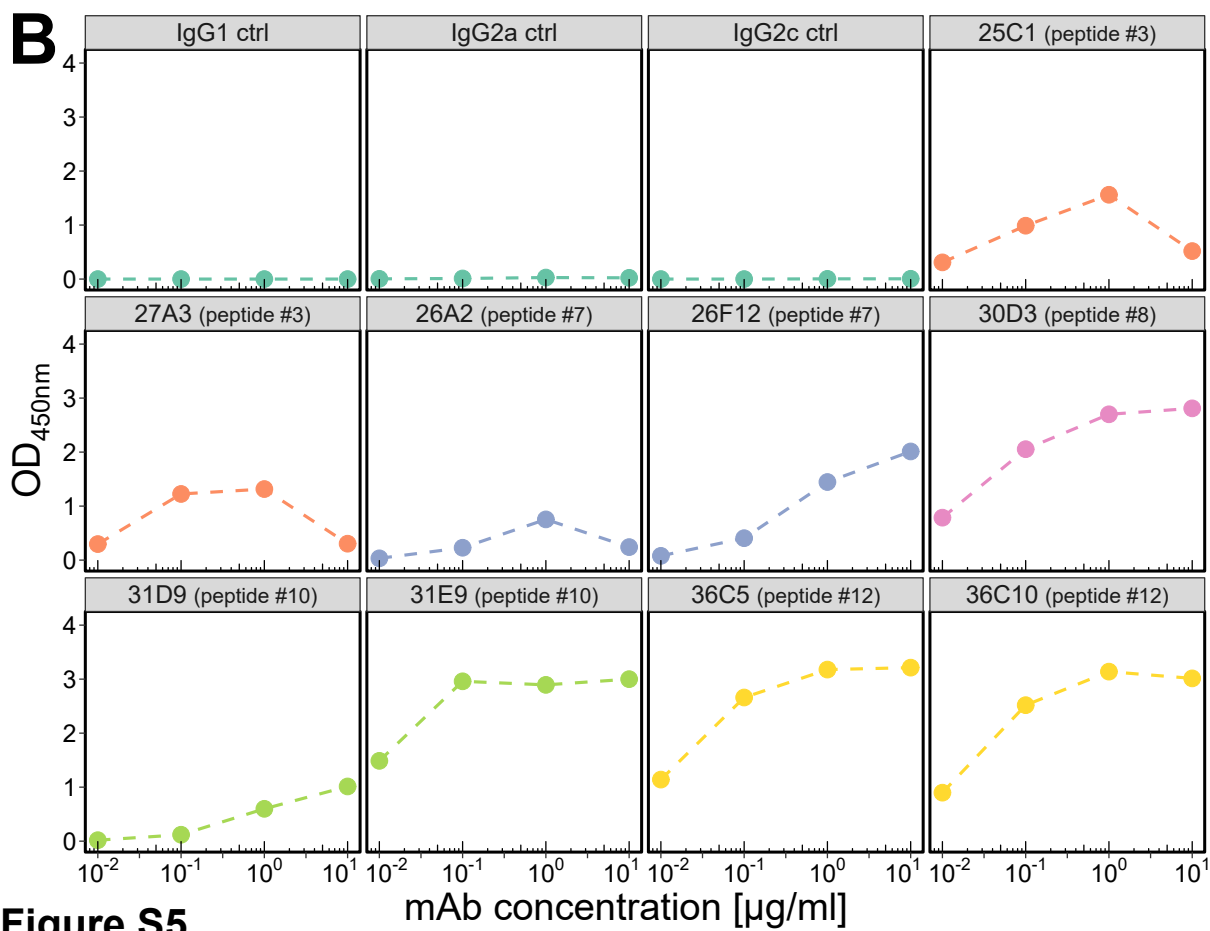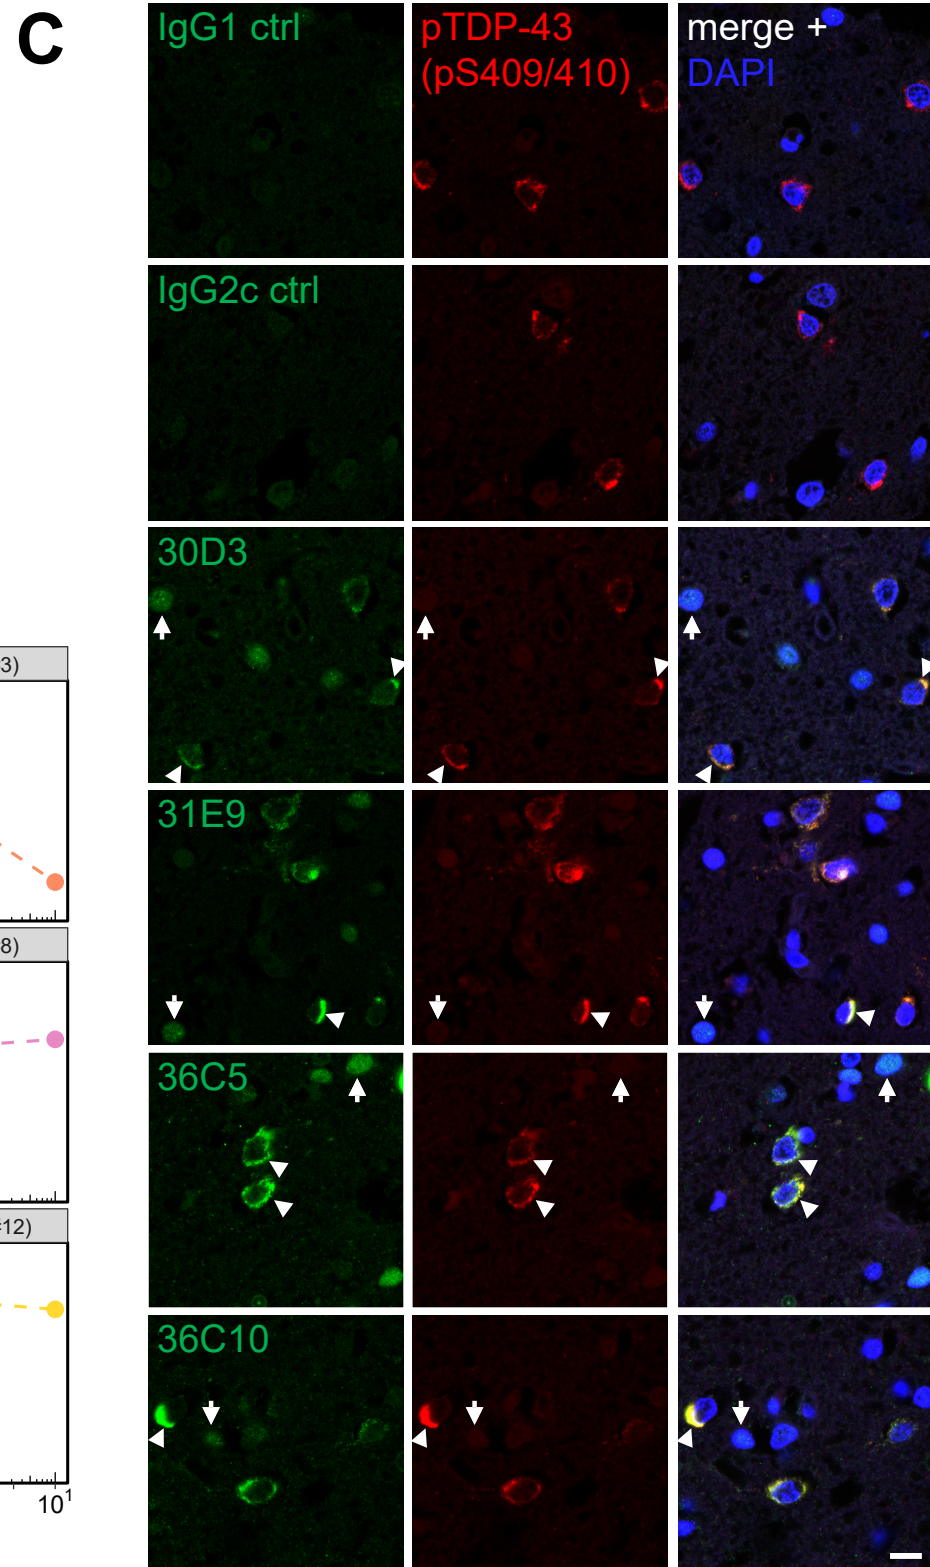

**Figure S5**
